A

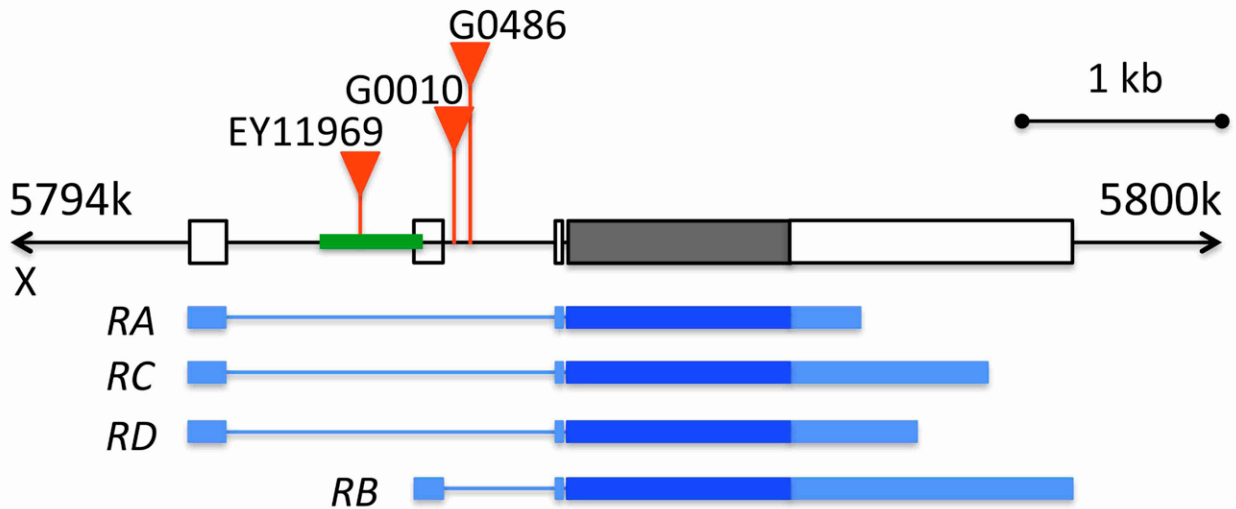

B

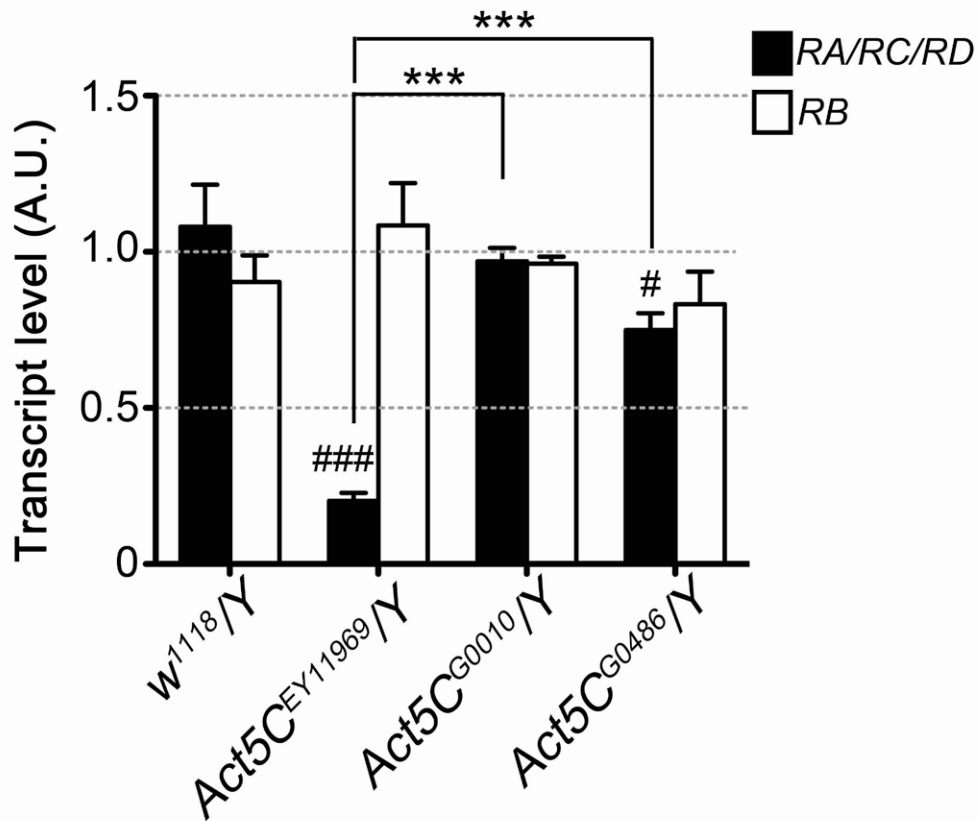

**Fig. S1. *Act5C* expression is reduced in *EY11969* flies.** (A) Schematic diagram of the *Act5C* genomic region. The top panel shows the insertion positions of P-element lines *EY11969*, *G0010* and *G0486*. Boxes represent exons, and the filled box in exon 3 represents the coding region. The proximal promoter is highlighted in green. The bottom panel shows the isoforms generated by alternative splicing. Dark blue boxes represent the ORFs. (B) qRT-PCR analysis of *Act5C* isoform expression in adult head extracts of *EY11969*, *G0010* and *G0486* male flies. Average (mean  $\pm$  SEM) is shown ( $n=5$ ). Significance was determined by two-way ANOVA with Bonferroni's correction (post tests). ### and # indicate  $P<0.001$  and  $P<0.05$ , respectively, when compared to wild-type flies *w*<sup>1118</sup>.

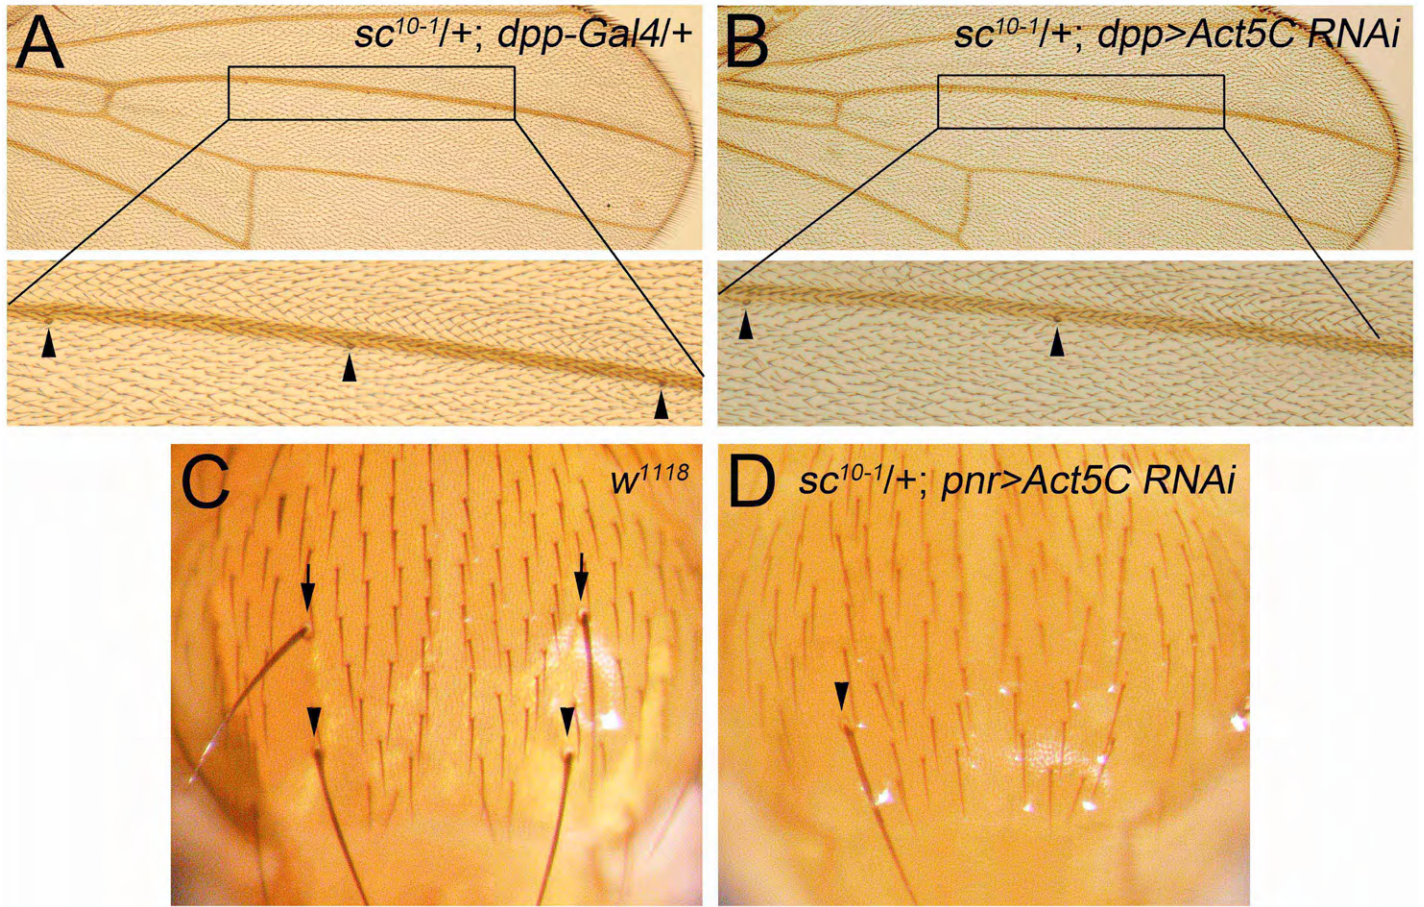

**Fig. S2. Knockdown of *Act5C* by RNAi disrupts bristle formation in *ac sc* heterozygous flies.** (A and B) Adult wings. Arrowheads indicate the campaniform sensilla on the LIII vein. Less than three campaniform sensilla were present on LIII vein of *sc<sup>10-1/+</sup>; dpp >Act5C RNAi* wing. (C and D) Adult notum. Arrows and arrowheads in (C) indicate the anterior and posterior DC bristles, respectively, in wild-type notum. Some DC bristles were missing in *sc<sup>10-1/+</sup>; pnr >Act5C RNAi* notum (D).

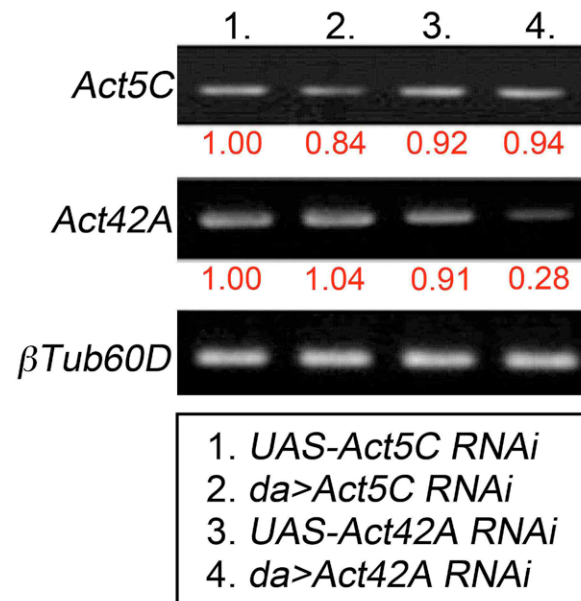

**Fig. S3. Knockdown efficiency of *Act5C* RNAi and *Act42A* RNAi.** RT-PCR analysis to show the levels of *Act5C* and *Act42A* mRNA.  $\beta$ *Tub60D* was used as the loading control. Representative results from two independent experiments are shown. The numbers indicate the relative levels of RT-PCR products (*actin*/ $\beta$ *Tub60D*) determined by DNA intensity analyzed by Image J.

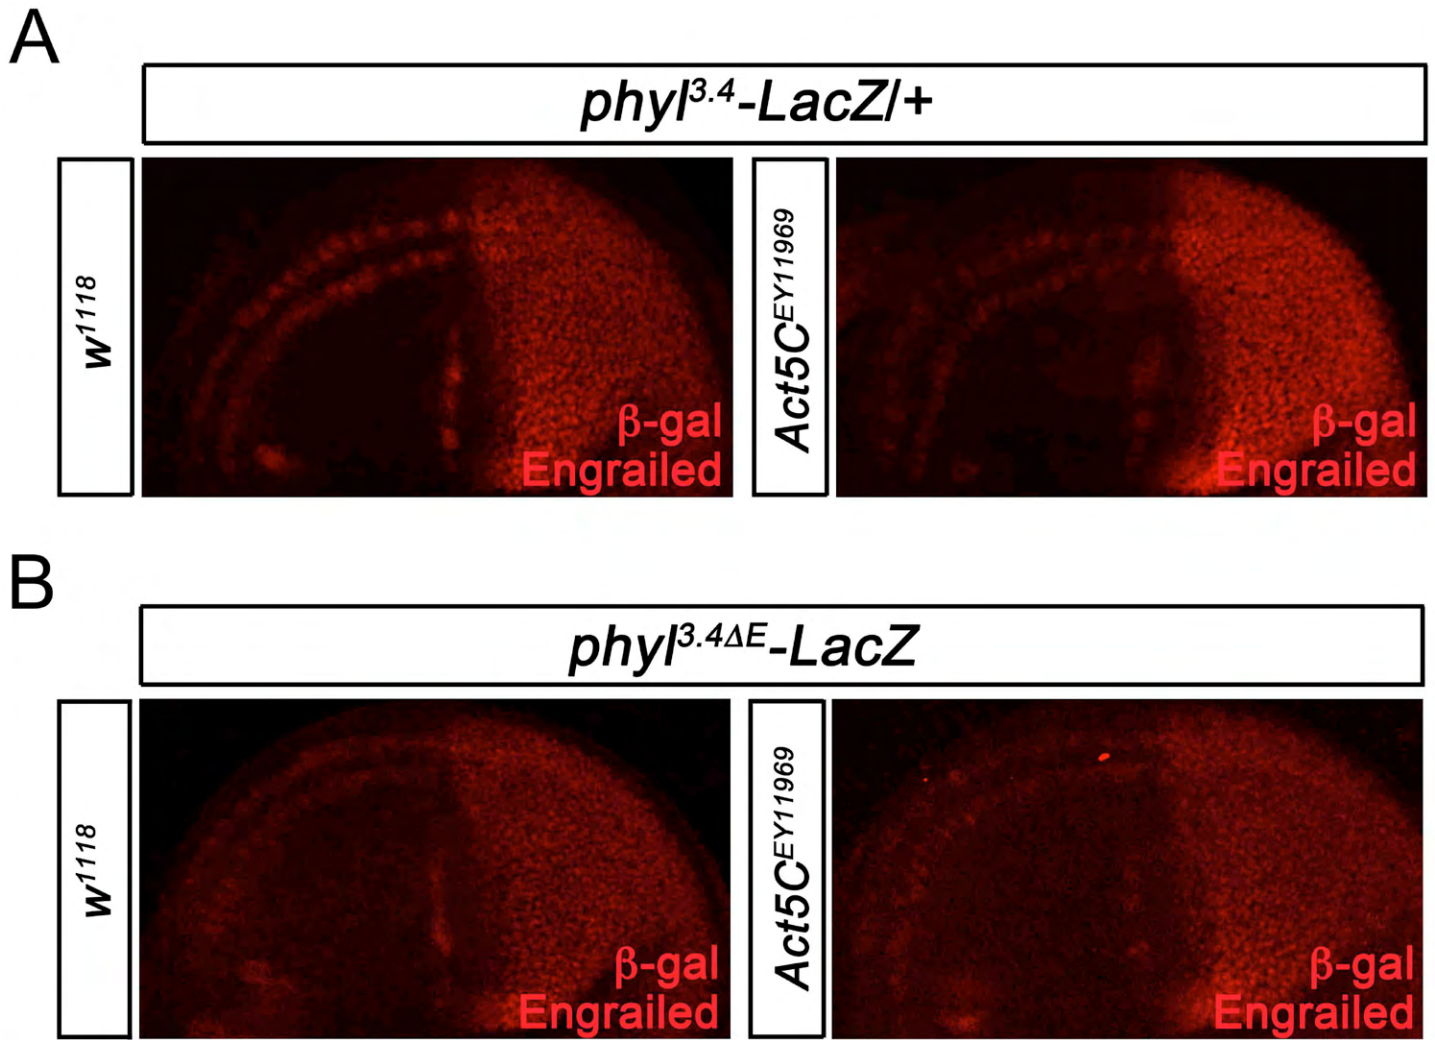

**Fig. S4. *Act5C* regulates *phyllopod* expression in an E-box dependent manner.** (A and B) Images of 0–1 hr APF wing discs from *phyl<sup>3.4</sup>-LacZ/+* (A) or *phyl<sup>3.4ΔE</sup>-LacZ* pupae (B), immunostained for β-galactosidase (red) and Engrailed (red). Anterior of the discs is to the left.



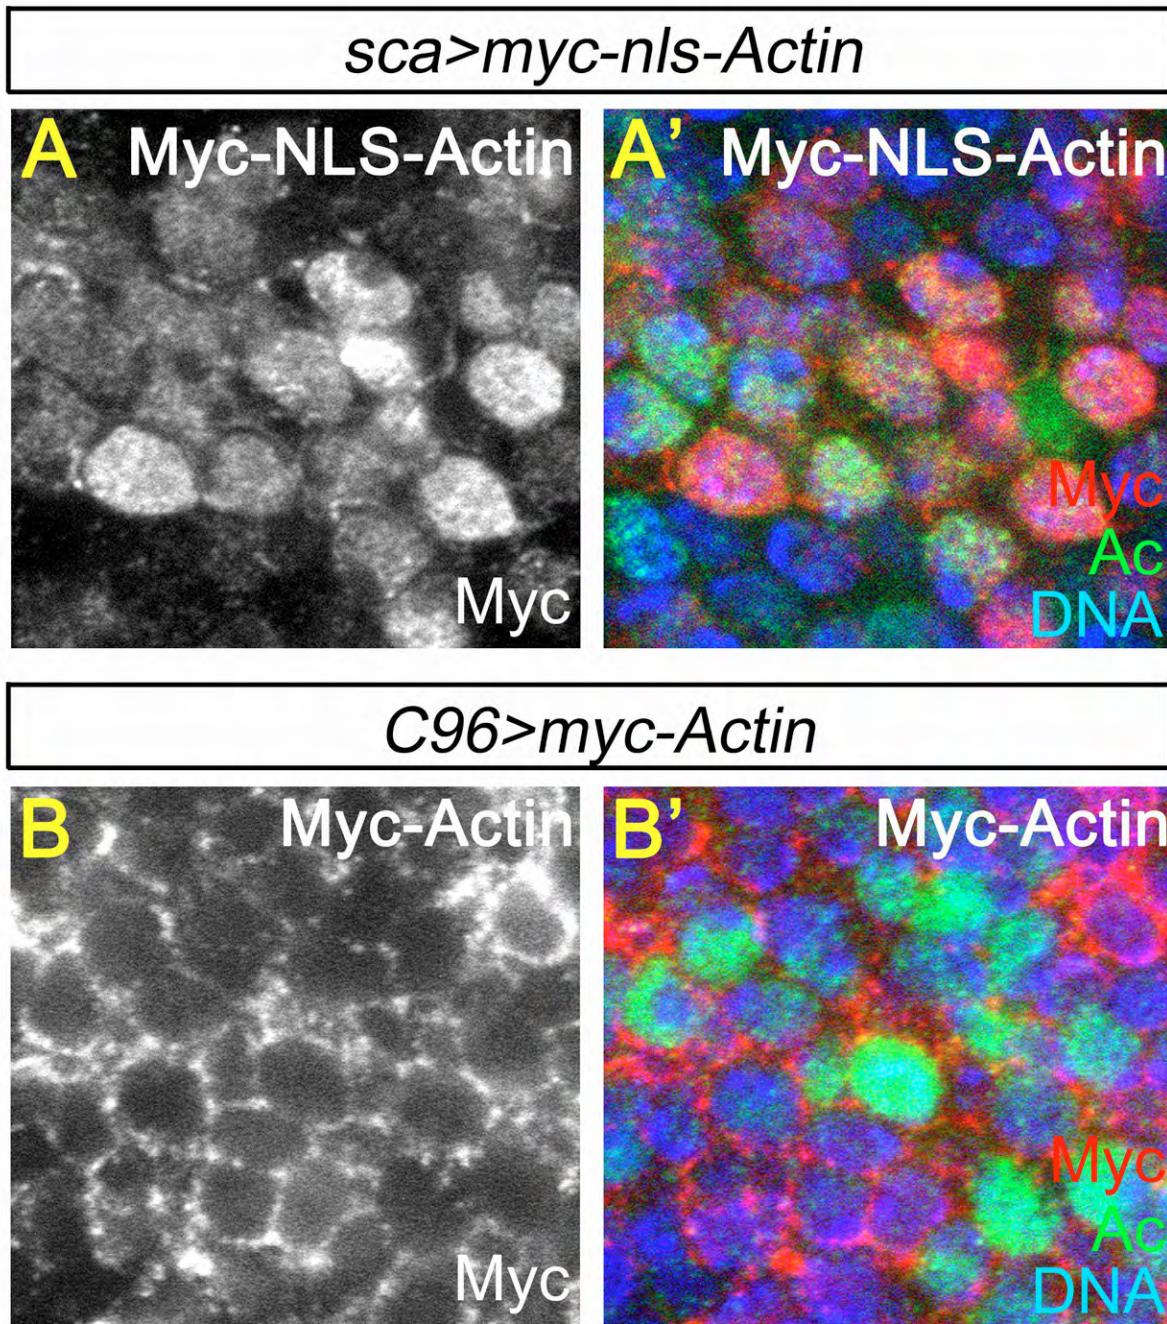

**Fig. S5. NLS-actin localizes in nuclei of proneural cells.** (A–B') Wing discs immunostained with anti-Myc antibody (red), co-stained with anti-Ac antibody (green) and DNA dye Hoechst 33342 (blue). (A and A') Myc-NLS-Actin accumulated in nuclei of Ac-positive proneural cells. (B and B') Myc-Actin primarily localized in cytoplasm of Ac-positive proneural cells. Low levels of Myc-Actin were also detected in nuclei.



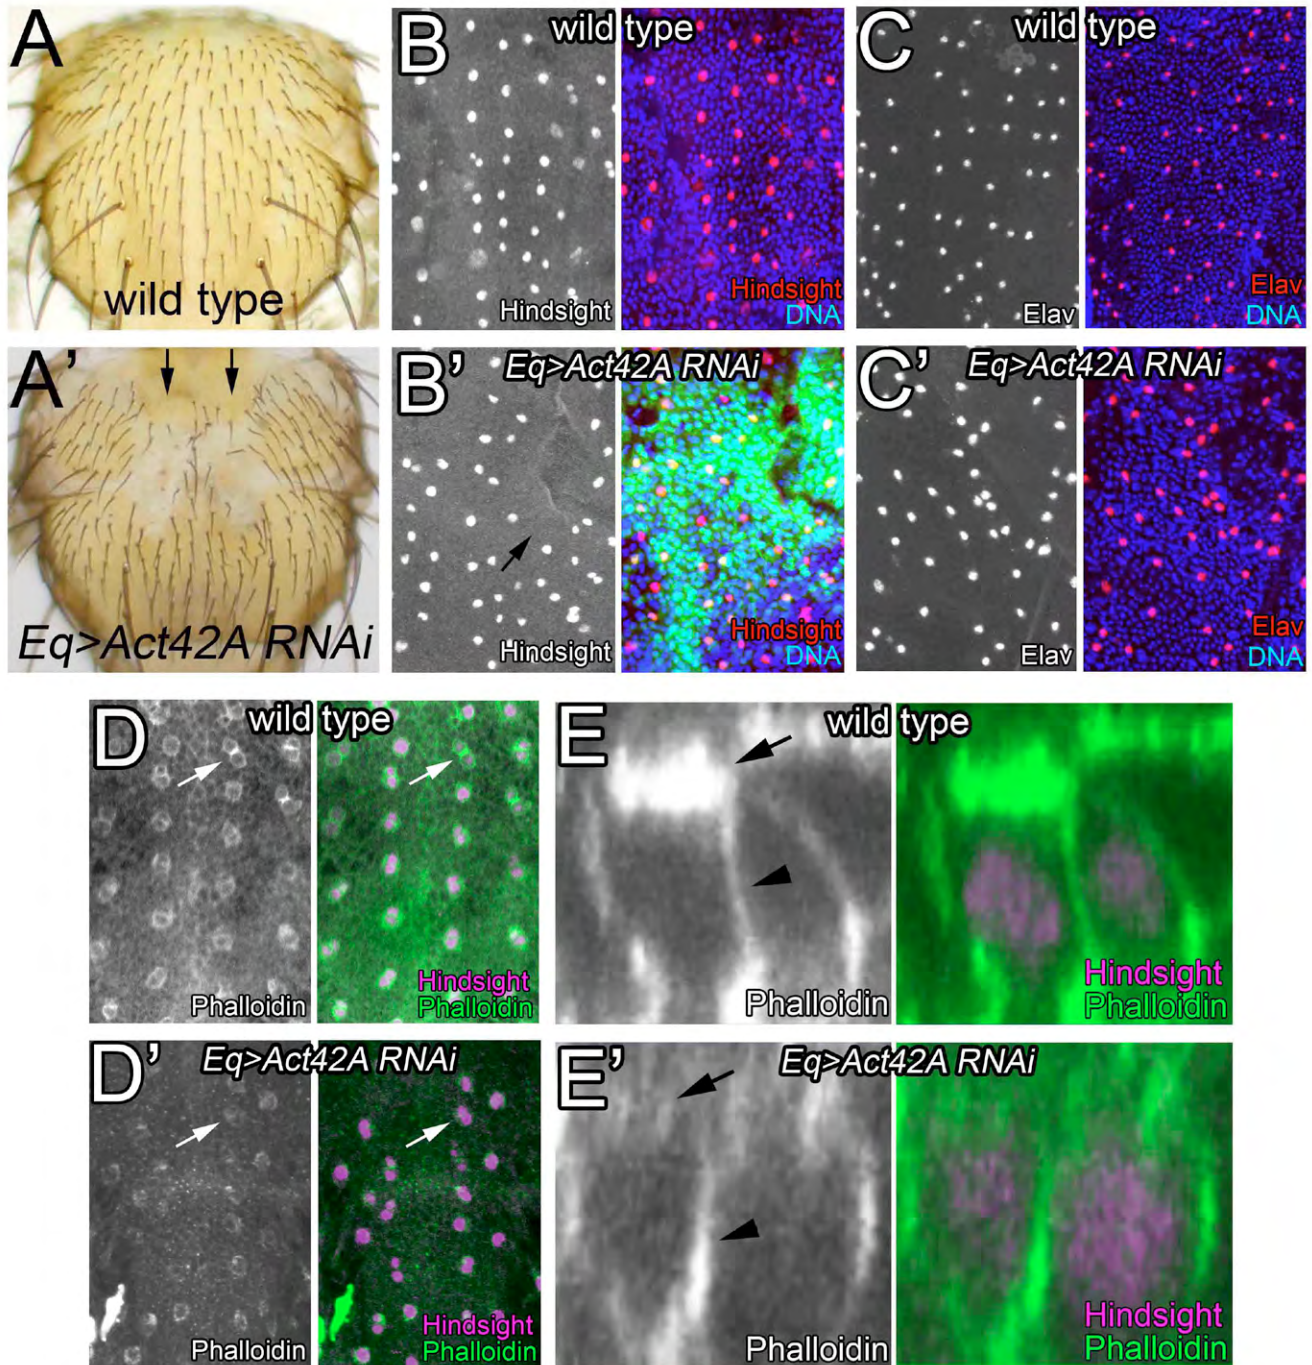

**Fig. S6. Reduction of actin levels does not influence pIIa/pIIb cell fate determination during ES organ development.** (A) Adult nota of wild-type and *Eeq > Act42A* flies. Arrows in (A') indicate where microchaetal bristles are missing. (B) Pupal nota immunostained with anti-Hindsight antibody, co-stained with anti-GFP antibody to mark the area where *Eeq-Gal4* is expressed. Arrows in (B') indicate where SOP specification is disrupted. (C) Pupa nota immunostained with anti-Elav antibody. Single Elav-positive cells observed in developing ES organs in both wild-type and *Eeq > Act42A RNAi* nota. (D) Pupa nota immunostained with phalloidin. Phalloidin intensities in ARS (arrows) as well as in epithelium reduced in *Eeq > Act42A RNAi* notum compared to wild-type notum. (E) Orthogonal sections showing ARS in two-cell cluster marked by anti-Hindsight staining (magenta). While the wild-type ARS has an umbrella-shaped structure with a lateral stalk (arrowhead) and an apical area (arrow) (E), the apical area of ARS in *Eeq > Act42A RNAi* notum was reduced (E').

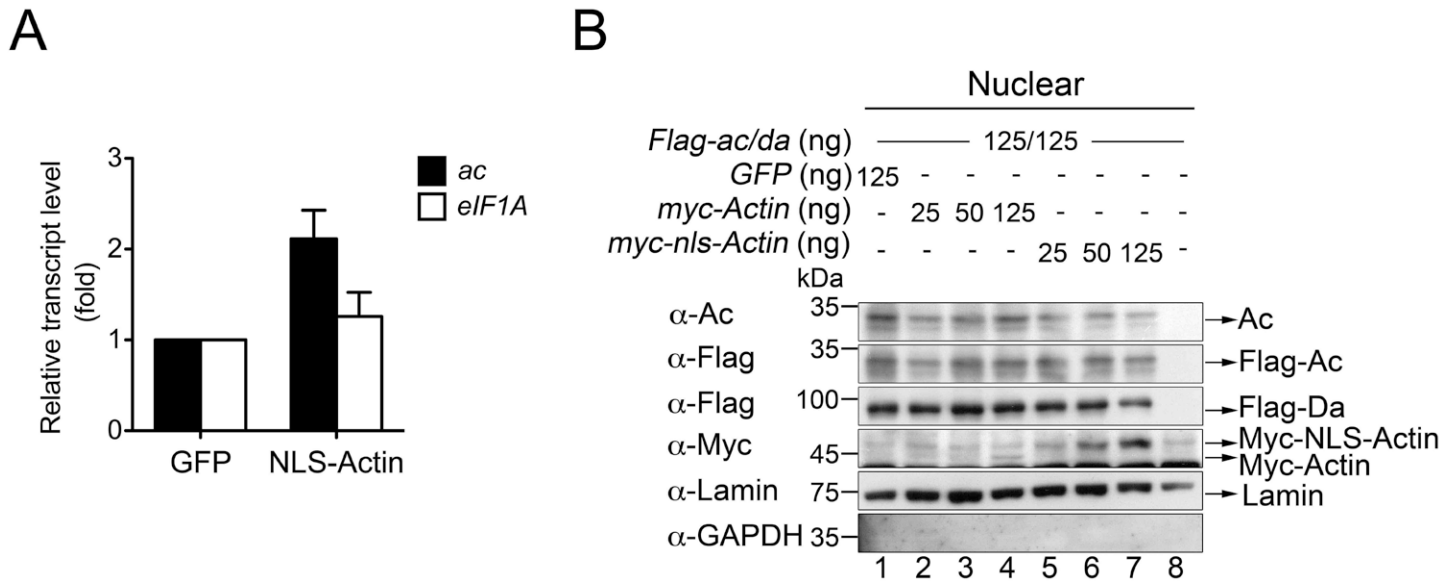

**Fig. S7. Total nuclear Ac levels unaffected by NLS-Actin in S2 cells transfected with *ac* and *da*.** (A) qRT-PCR analysis of endogenous *ac* and *eIF1A* mRNA in *ac* and *da*-transfected S2 cells, co-transfected with *GFP* or *myc-NLS-Actin*. Transcript levels were normalized with that of *rpL32*. Average (mean  $\pm$  SEM) is shown ( $n=3$ ). (B) Western blot analysis showing comparable levels of total nuclear Ac detected by anti-Ac antibody in cells transfected with *GFP*, *myc-Actin* or *myc-NLS-Actin*.

|                  | Position | Sequence                |
|------------------|----------|-------------------------|
| Actin5C/Actin42A | 20-29    | AGFAGDDAPR              |
|                  | 30-40    | AVFPSIVGRPR             |
|                  | 41-51    | HQGVMVGMGQK             |
|                  | 52-63    | DSYVGDEAQSQR            |
|                  | 86-96    | IWHHTFYNELR             |
|                  | 97-114   | VAPEEHPVLLTEAPLNPK      |
|                  | 179-192  | LDLAGRDLTDYLMK          |
|                  | 198-211  | GYSFTTTAEREIVR          |
|                  | 240-255  | SYELPDGQVITIGNER        |
|                  | 292-313  | KDLYANTVLSSGGTTMYPGIADR |
|                  | 361-373  | QEYDESGPSIVHR           |
| Actin5C          | 328-336  | IKIIAPPER               |
| Actin42A         | 328-336  | IKIVAPPER               |

**Table S1. Identified peptides from mass spectrometric analysis of the 42 kDa protein band.** Peptides matching with either Act5C or Act42A are shown.
